# Supplementary material for: Cooperation of endogenous and exogenous reactive oxygen species induced by zinc peroxide nanoparticles to enhance oxidative stress-based cancer therapy
Source: PubMed Central journal article supplement (PMC6831298; doi:10.7150/thno.39831), 2019-09-23
Supplement: thnov09p7200s1.pdf [file thnov09p7200s1.pdf]

# Supporting Information

## Cooperation of endogenous and exogenous reactive oxygen species induced by zinc peroxide nanoparticles to enhance oxidative stress-based cancer therapy

Li-Sen Lin<sup>1,2\*</sup>, Jun-Feng Wang<sup>3\*</sup>, Jibin Song<sup>4\*</sup>, Yijing Liu<sup>2</sup>, Guizhi Zhu<sup>2</sup>, Yunlu Dai<sup>2</sup>, Zheyu Shen<sup>2</sup>, Rui Tian<sup>2</sup>, Justin Song<sup>2</sup>, Zhantong Wang<sup>2</sup>, Wei Tang<sup>2</sup>, Guocan Yu<sup>2</sup>, Zijian Zhou<sup>2</sup>, Zhen Yang<sup>2</sup>, Tao Huang<sup>5</sup>, Gang Niu<sup>2</sup>, Huang-Hao Yang<sup>4</sup>, Zhi-Yi Chen<sup>1</sup>✉, Xiaoyuan Chen<sup>2</sup>✉

<sup>1</sup>Department of Ultrasound Medicine, Laboratory of Ultrasound Molecular Imaging, the Third Affiliated Hospital of Guangzhou Medical University, Guangzhou 510150, China

<sup>2</sup>Laboratory of Molecular Imaging and Nanomedicine (LOMIN), National Institute of Biomedical Imaging and Bioengineering (NIBIB), National Institutes of Health (NIH), Bethesda, Maryland 20892, United States

<sup>3</sup>Department of Ultrasound, the First Affiliated Hospital of Harbin Medical University, Harbin, Heilongjiang 150076, China

<sup>4</sup>MOE Key Laboratory for Analytical Science of Food Safety and Biology, College of Chemistry, Fuzhou University, Fuzhou 350108, China

<sup>5</sup>Department of Radiology, the Fourth Hospital of Harbin Medical University, Harbin, Heilongjiang 150076, China

\*These authors contributed equally to this work.

✉Corresponding authors: Zhi-Yi Chen (winchen@vip.126.com), Xiaoyuan Chen (shawn.chen@nih.gov)

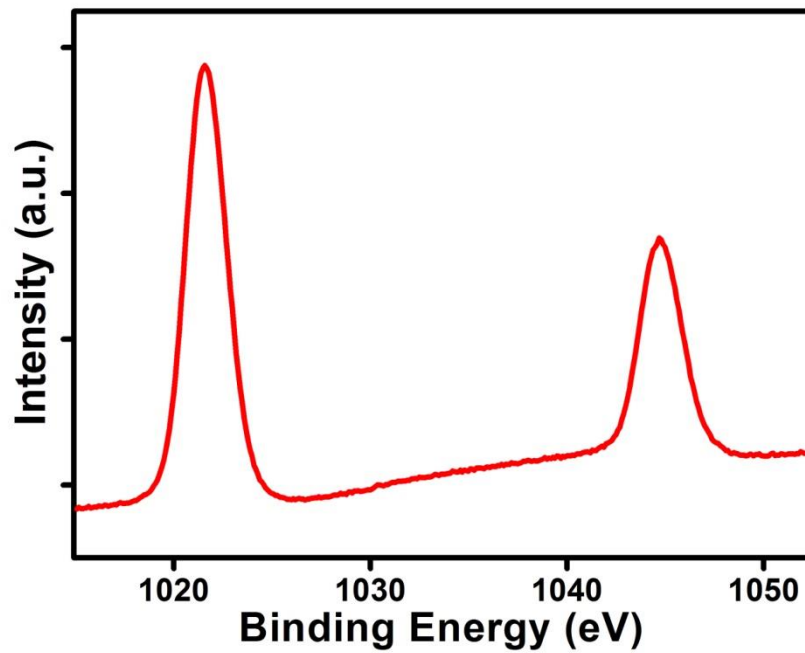

**Figure S1.** Zn 2p X-ray photoelectron spectroscopy (XPS) spectra of ZnO<sub>2</sub> NPs.

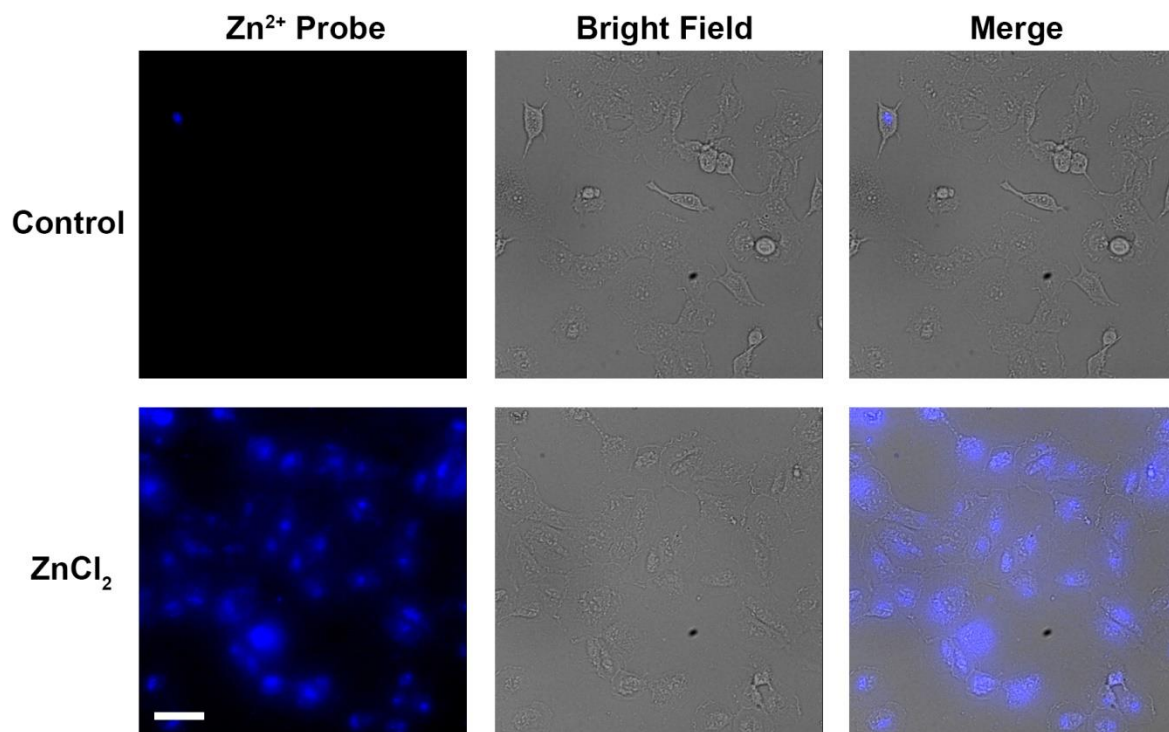

**Figure S2.** Fluorescence images of zinquin ethyl ester-stained U87MG cells after incubation with 100  $\mu$ M ZnCl<sub>2</sub> for 4 h. Scale bar, 50  $\mu$ m.

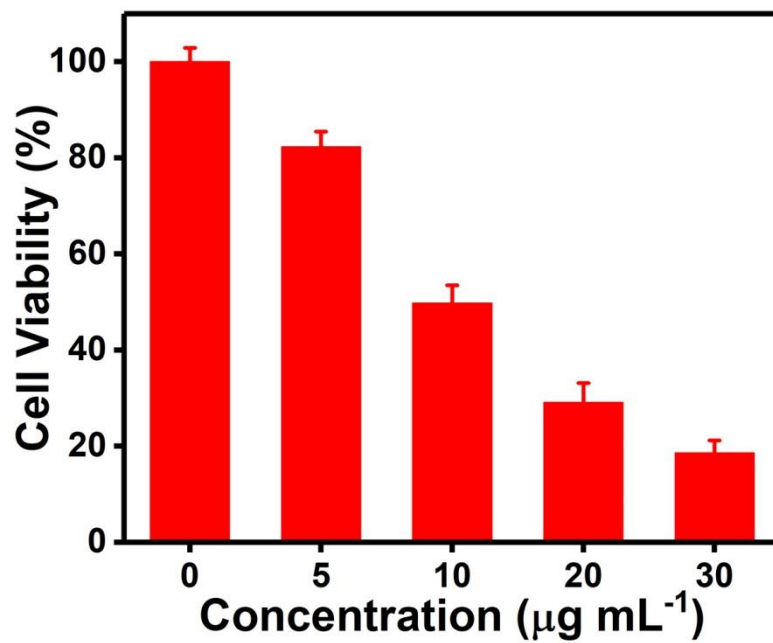

**Figure S3.** *In vitro* anticancer activity of ZnO<sub>2</sub> NPs after 48 h of incubation.

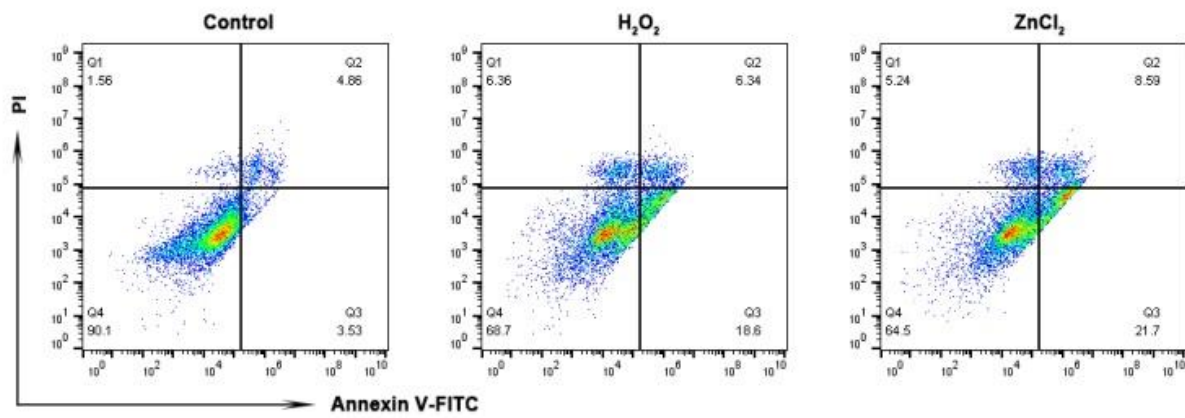

**Figure S4.** Flow cytometry data showing apoptosis in U87MG cells after incubation with 200  $\mu\text{M}$  H<sub>2</sub>O<sub>2</sub> or 200  $\mu\text{M}$  ZnCl<sub>2</sub> for 12 h.

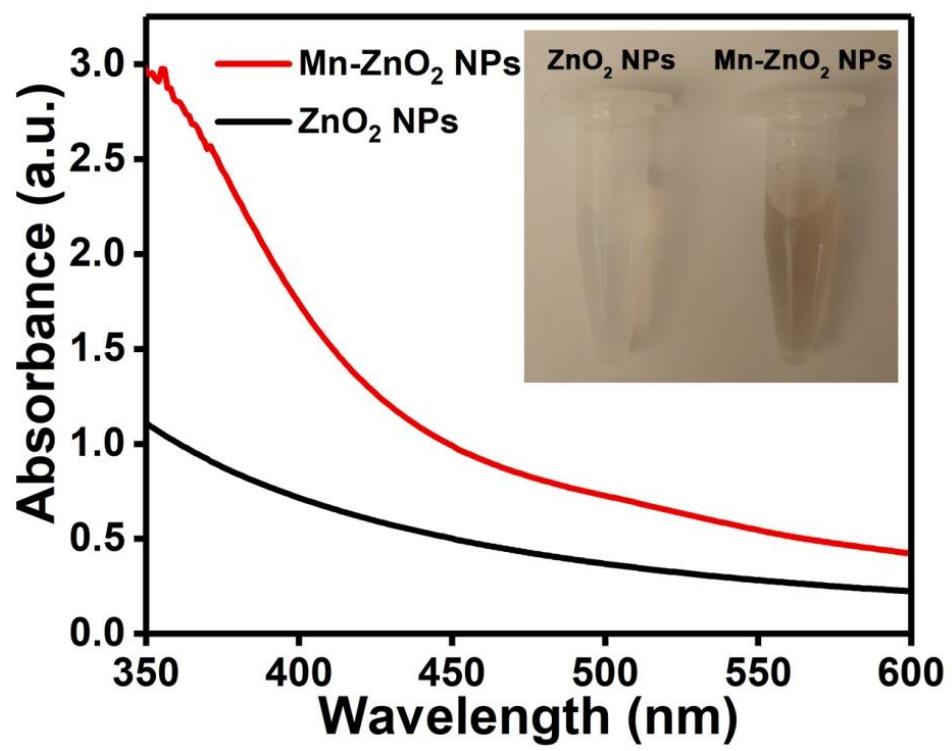

**Figure S5.** UV/Vis absorption spectra of ZnO<sub>2</sub> NPs before and after Mn-doping.

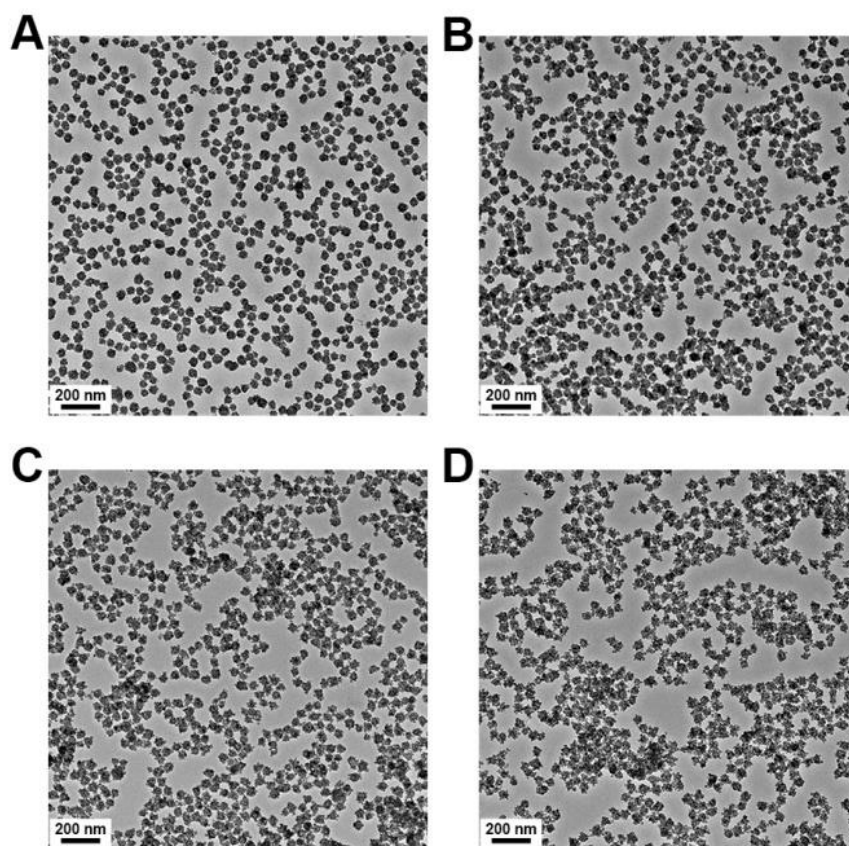

**Figure S6.** TEM images of Mn-ZnO<sub>2</sub> NPs with different ratio of Mn. The weight fraction of Mn: (A) 0%, (B) 4.3%, (C) 6.5%, and (D) 10.6%.

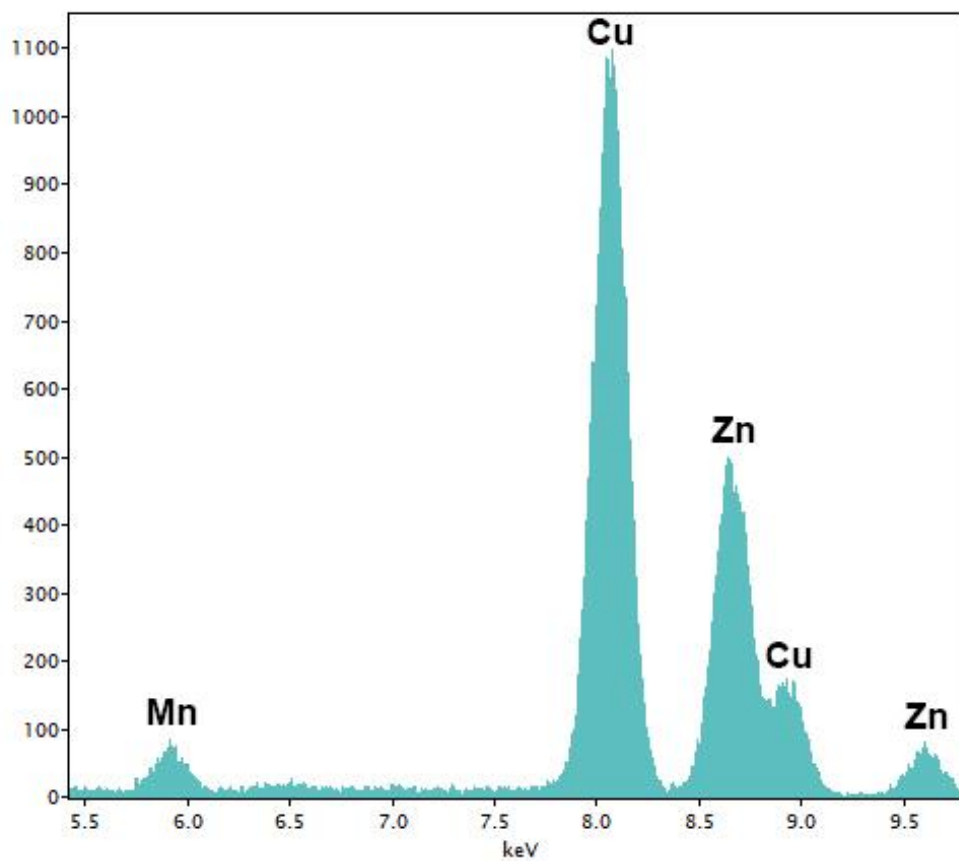

**Figure S7.** EDS spectrum of Mn-ZnO<sub>2</sub> NPs. Note that the signal of Cu is from the copper grid.



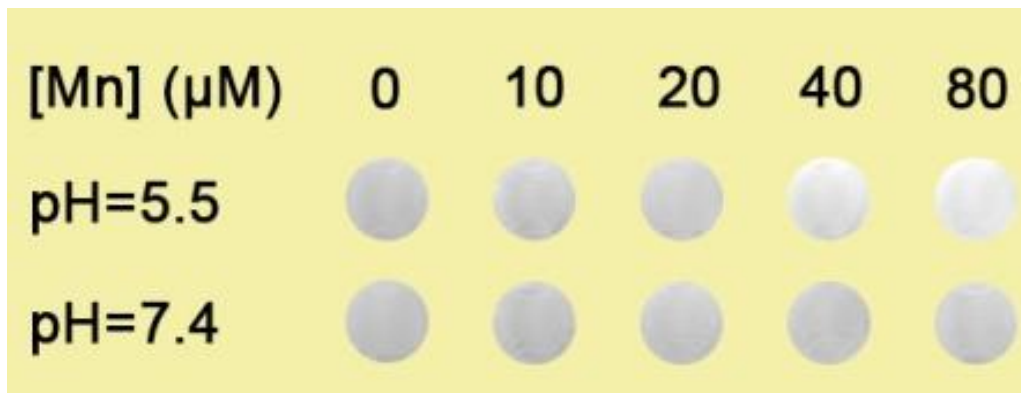

**Figure S8.**  $T_1$ -weighted MRI images of Mn-ZnO<sub>2</sub> NPs under different pH conditions.

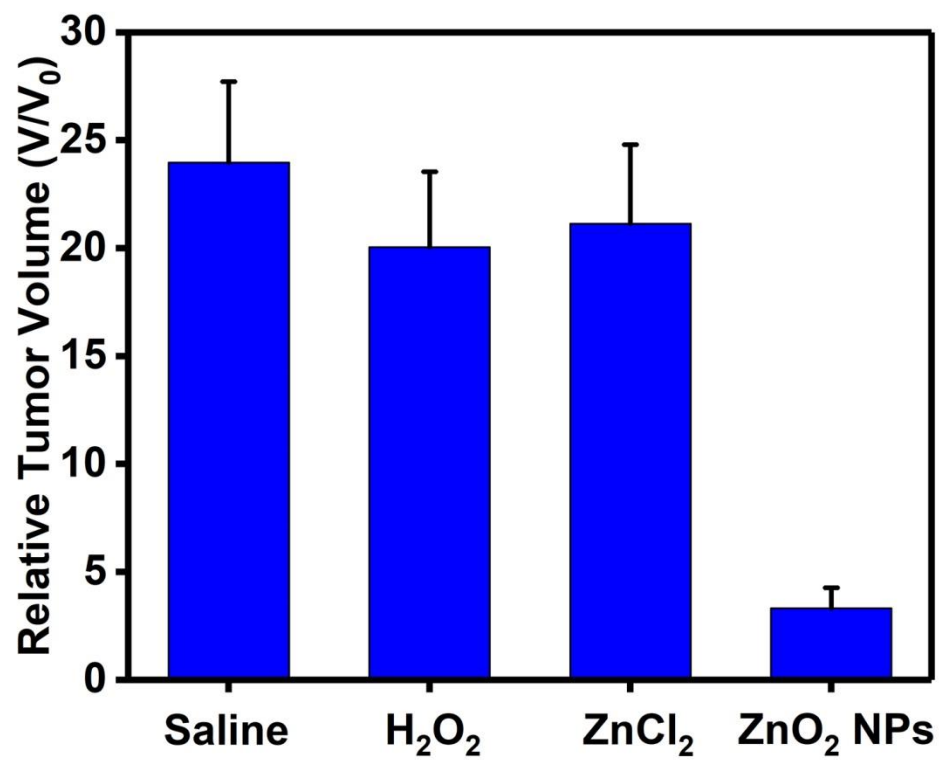

**Figure S9.** Tumor sizes at day 14 in different groups.

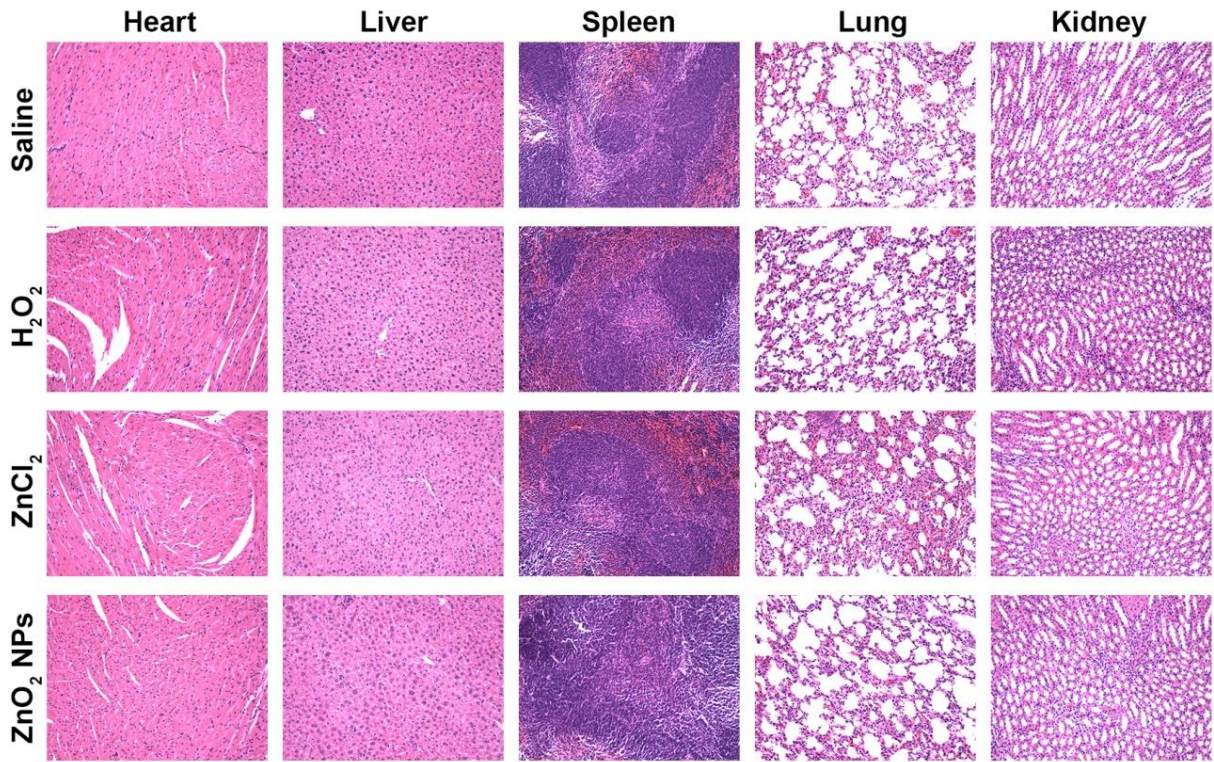

**Figure S10.** H&E-stained images of major organs collected from different groups of mice at day 14.
